# Supplementary material
Source: HighWire-hosted journal article supplement (https://jitc.bmj.com/content/8/2/e001185)
Supplement: inline-supplementary-material-13 [file inline-supplementary-material-13.xlsx]

## Sheet: Supplementary Table S14
Supplementary Table S14. Top 50 clonotypes of K-2813
	Pre		Cultured γδT		Post
TRDV TRDJ CDR3	%Reads (Pre)	Rank (Pre)	%Reads (Cultured )	Rank (Cultured )	%Read (Post)	Rank (Post)
TRDV2 TRDJ1 CACDTVTLAGLGTSTLTDKLIF	33.6514	1	66.0911	1	0
TRDV3 TRDJ1 CAFIGLWGYTDKLIF	5.50374	2	0		0.582809	26
TRDV3 TRDJ1 CAFKEGRYIYTDKLIF	4.75726	3	0		0.401006	35
TRDV2 TRDJ3 CACDTVNSWDTRQMFF	4.61266	4	2.44068	4	9.74153	3
TRDV2 TRDJ1 CACDTVLGAPYTDKLIF	4.13368	5	2.96686	3	13.9313	1
TRDV2 TRDJ1 CACDTLWGSTYTDKLIF	4.11018	6	6.92696	2	13.1033	2
TRDV2 TRDJ1 CACDRLAHSSGGYLGGPDKLIF	2.43466	7	0.33765	12	1.6061	11
TRDV2 TRDJ2 CACDTVGLGVSPALTAQLFF	2.36055	8	1.96334	5	2.68237	6
TRDV2 TRDJ1 CACDTLKSPDNWGINTDKLIF	1.99906	9	0.0685583	50	0.633714	24
TRDV2 TRDJ3 CACDTIPHTGDTPRDTRQMFF	1.7171	10	0.148257	26	1.46066	14
TRDV2 TRDJ1 CACDVLGVYTDKLIF	1.65564	11	0.168825	22	0.850838	20
TRDV2 TRDJ1 CACDSVLGDRQDTDKLIF	1.25077	12	0.754141	7	0.735523	21
TRDV1 TRDJ1 CALGELAVYWGILGFSIGHTDKLIF	1.2345	13	0		0.525671	27
TRDV1 TRDJ1 CALGEHLAFSLLGDGWYTDKLIF	1.15497	14	0		0
TRDV2 TRDJ3 CACDRAGGYALWDTRQMFF	1.13871	15	1.59484	6	8.50631	4
TRDV2 TRDJ1 CACDYTGGSDKLIF	1.02845	16	0.503047	9	1.14796	15
TRDV2 TRDJ1 CACDTVTLSGLGTSTLTDKLIF	1.0158	17	0		0
TRDV2 TRDJ1 CACDTVRRVWDGGYLTDKLIF	0.938076	18	0.3745	10	3.94876	5
TRDV2 TRDJ1 CACDPILGLGRYTDKLIF	0.809746	19	0.0694153	49	1.70583	10
TRDV2 TRDJ1 CACDTVGGYHLYTDKLIF	0.791671	20	0.100267	37	0.447755	32
TRDV1 TRDJ4 CALGEPLFLPTGGYIGSGPLIF	0.766367	21	0		0
TRDV2 TRDJ3 CACDTIDPTVGGGSVWDTRQMFF	0.755522	22	0		0
TRDV2 TRDJ1 CACAFLLGDRTPYTDKLIF	0.741062	23	0.276804	15	1.50429	13
TRDV2 TRDJ1 CACDTLGPTGGQTKLIF	0.694068	24	0		0
TRDV1 TRDJ1 CALGELPKEGCYTDKLIF	0.638036	25	0		0
TRDV2 TRDJ1 CACDRLGVTDKLIF	0.630806	27	0		0.475805	29
TRDV2 TRDJ1 CACDTLFGGVLGDREVRDKLIF	0.630806	26	0		0
TRDV2 TRDJ1 CACDTVLGDKKGDKLIF	0.623577	28	0.3008	14	0.440483	33
TRDV2 TRDJ1 CACDTILGENPYTDKLIF	0.59285	29	0		0
TRDV2 TRDJ1 CACDAWGLNTDKLIF	0.56393	30	0.3745	11	1.82323	9
TRDV3 TRDJ2 CATTFLPAGWGIAAQLFF	0.520551	31	0		0
TRDV1 TRDJ1 CALGDPNWTTDKLIF	0.497054	32	0		0
TRDV1 TRDJ1 CALGEHFLDKADKLIF	0.486209	33	0		0
TRDV2 TRDJ1 CACDTVRYSGGSAGHDKLIF	0.41391	34	0		0
TRDV2 TRDJ1 CACDTLGDTQRDTDKLIF	0.410295	35	0		0
TRDV2 TRDJ1 CACDTVGGDSDKLIF	0.381376	36	0		0
TRDV2 TRDJ1 CACDTVGLGDKLIF	0.375953	37	0		0
TRDV2 TRDJ1 CACDNIRSYGGLLGDTKYTDKLIF	0.363301	38	0		0
TRDV1 TRDJ1 CALGEPQVLFLRMYWGIRDTDKLIF	0.341612	39	0		0
TRDV2 TRDJ1 CACDTVQSGGTHHTDKLIF	0.325344	40	0		0
TRDV2 TRDJ1 CACDIIPTQRVLGDDRATDKLIF	0.29281	41	0		0
TRDV2 TRDJ1 CACDPLVVGDIDKLIF	0.272928	42	0		0.244136	49
TRDV2 TRDJ1 CACDSWGIADKLIF	0.247623	43	0		0
TRDV1 TRDJ1 CALGDLFRPSPRFATPSDKLIF	0.238586	44	0		0
TRDV2 TRDJ1 CACAQIGGIGVRELIF	0.236778	45	0		0
TRDV2 TRDJ3 CACDKLGDTLGFSTWDTRQMFF	0.234971	46	0		0
TRDV3 TRDJ1 CAFKAGYWGKYTDKLIF	0.233163	47	0		0
TRDV2 TRDJ1 CACERLGDSLLYTDKLIF	0.215089	48	0		0
TRDV2 TRDJ3 CACDGATGGPLSSWDTRQMFF	0.209666	49	0		0
TRDV2 TRDJ1 CACDSLGESRWNTDKLIF	0.209666	50	0		0
TRDV2 TRDJ1 CACDTVPTFHTGGAGSPDTDKLIF	0		0.64102	8	2.37175	7
TRDV2 TRDJ1 CACDTAGGPGYTDKLIF	0		0.301657	13	1.11367	16
TRDV2 TRDJ1 CACDTVNTGADTDKLIF	0		0.22967	16	0
TRDV2 TRDJ4 CACDKLGDTRPLIF	0		0.217673	17	0.486193	28
TRDV2 TRDJ1 CACDVLGDKYTDKLIF	0		0.213388	18	0.603586	25
TRDV2 TRDJ1 CACDTLGDTYTDKLIF	0		0.209103	19	0.862266	18
TRDV2 TRDJ1 CACDTVTLAGLGTSNLTDKLIF	0		0.203961	20	0
TRDV2 TRDJ1 CACDTVPSTVLGDKLIF	0		0.191963	21	0.853955	19
TRDV2 TRDJ1 CACDTITGGSQEGELIF	0		0.165397	23	1.59363	12
TRDV2 TRDJ1 CACDNVLGDTRRDKLIF	0		0.158541	24	0
TRDV2 TRDJ1 CDCDTVTLAGLGTSTLTDKLIF	0		0.15597	25	0
TRDV2 TRDJ1 CACDTVSSYVKNGGYDKLIF	0		0.145686	27	0.381267	36
TRDV2 TRDJ1 CACDTVTLVGLGTSTLTDKLIF	0		0.143115	28	0
TRDV2 TRDJ1 CACDTLRGGYTRWTDKLIF	0		0.123405	29	0.457105	30
TRDV2 TRDJ1 CACDTVNLAGLGTSTLTDKLIF	0		0.122548	30	0
TRDV2 TRDJ1 CACDTVGRTGDQYTDKLIF	0		0.118263	31	0.29504	43
TRDV2 TRDJ1 CACDTVTLAGLGTSTHTDKLIF	0		0.116549	32	0
TRDV2 TRDJ1 CVCDTVTLAGLGTSTLTDKLIF	0		0.111407	33	0
TRDV2 TRDJ1 CACDNVTLAGLGTSTLTDKLIF	0		0.11055	34	0
TRDV2 TRDJ1 WACDTVTLAGLGTSTLTDKLIF	0		0.109693	35	0
TRDV2 TRDJ1 CACDTGTLAGLGTSTLTDKLIF	0		0.108836	36	0
TRDV2 TRDJ3 CACDPLPGTGDSPSWDTRQMFF	0		0.100267	38	2.01542	8
TRDV2 TRDJ1 CACDRLGAPSAYTDKLIF	0		0.0985526	39	0.709551	23
TRDV2 TRDJ3 CACDPILGDISSWDTRQMFF	0		0.0985526	40	0.457105	31
TRDV2 TRDJ2 CACFPLGDLTAQLFF	0		0.0942677	41	0.379189	37
TRDV2 TRDJ1 CACDTMTLAGLGTSTLTDKLIF	0		0.0934107	42	0
TRDV2 TRDJ1 CACDTVNGGYQGDTDKLIF	0		0.0874118	43	0.248291	48
TRDV2 TRDJ1 CACDGLGDTNPDKLIF	0		0.0831269	44	0.71994	22
TRDV2 TRDJ1 CACDTVTLAGLGMSTLTDKLIF	0		0.0771281	45	0
TRDV2 TRDJ1 CACETVTLAGLGTSTLTDKLIF	0		0.0762711	46	0
TRDV2 TRDJ1 CACDTVTLADLGTSTLTDKLIF	0		0.0728432	47	0
TRDV2 TRDJ1 CACDPVTLAGLGTSTLTDKLIF	0		0.0711292	48	0
TRDV2 TRDJ1 CACDGVLGDTSWTDKLIF	0		0		0.903821	17
TRDV2 TRDJ1 CACDTLGWGKNTDKLIF	0		0		0.404122	34
TRDV2 TRDJ1 CACDSLVGDTSYTDKLIF	0		0		0.371917	38
TRDV2 TRDJ3 CACDTSEVWGHSRGGSWDTRQMFF	0		0		0.348023	39
TRDV2 TRDJ1 CACDTMGDYNTDKLIF	0		0		0.336595	40
TRDV2 TRDJ1 CACDTVPTWGDTRATTDKLIF	0		0		0.317896	41
TRAV23/DV6 TRDJ3 CAAYNTRQMFF	0		0		0.298157	42
TRDV2 TRDJ1 CACDKLGDYTDKLIF	0		0		0.290885	44
TRDV2 TRDJ1 CACDTLGDKTDKLIF	0		0		0.272185	45
TRDV2 TRDJ1 CACELLGDTHPTDKLIF	0		0		0.252447	46
TRAV38-2/DV8 TRDJ1 CAFMKGYWGIRFRYTDKLIF	0		0		0.24933	47
TRDV2 TRDJ1 CACVRLGARDKLIF	0		0		0.243097	50
